# Supplementary material for: Prussian blue derived iron oxide nanoparticles wrapped in graphene oxide sheets for electrochemical supercapacitors
Source: Royal Society of Chemistry journal article supplement (doi:10.1039/c7ra03179c), 2017-01-01
Supplement: c7ra03179c1.pdf [file c7ra03179c1.pdf]

## Supporting Information

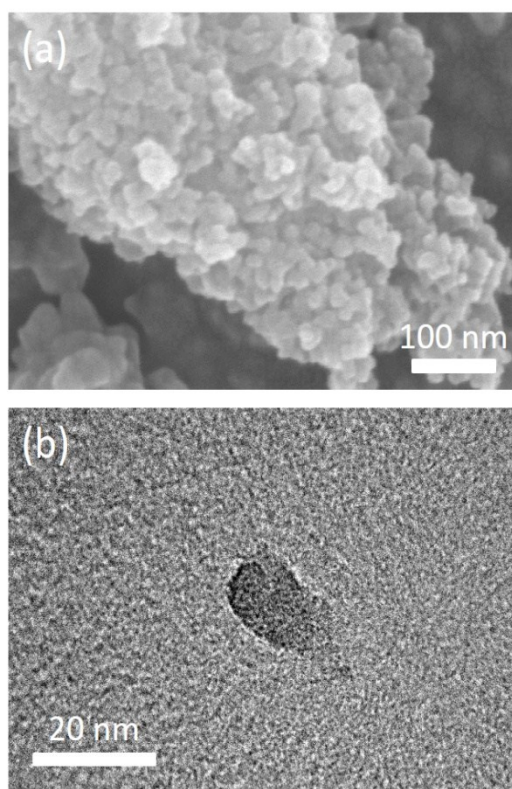

**Fig. S1** (a) SEM and (b) TEM images of PB nanoparticles used in this study.

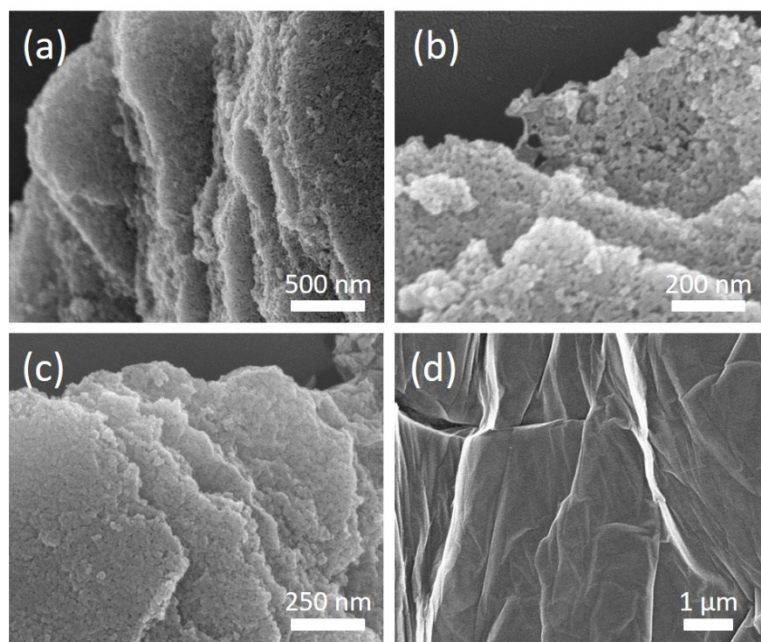

**Fig. S2** SEM images of the un-calcined samples prepared with various GO:PB ratios [The GO:PB ratios are (a) 25:75, (b) 50:50, (c) 75:25, and (d) 100:0, respectively].

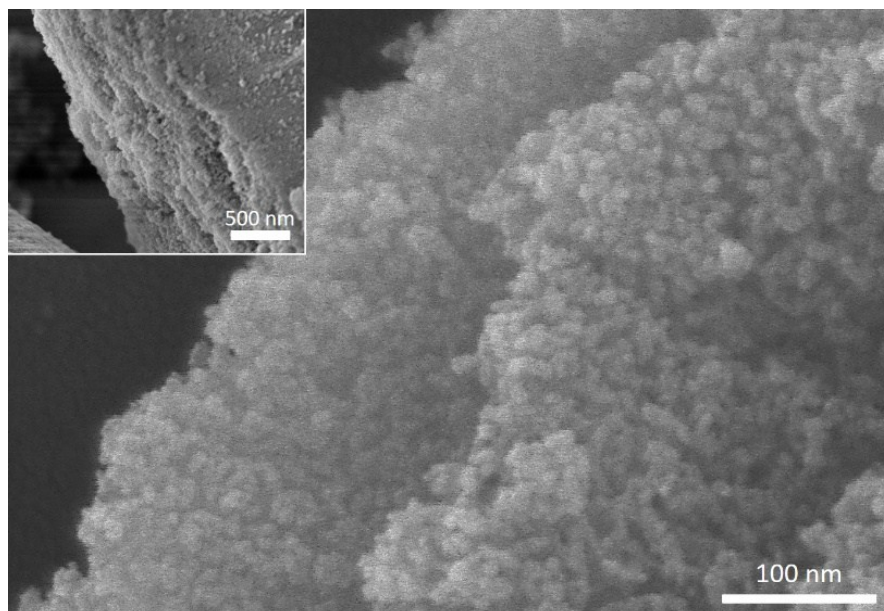

**Fig. S3** SEM image of the GO/IO hybrid prepared from the thermal treatment of the GO/PB sample (GO:PB=25:75) at 400 °C in air.

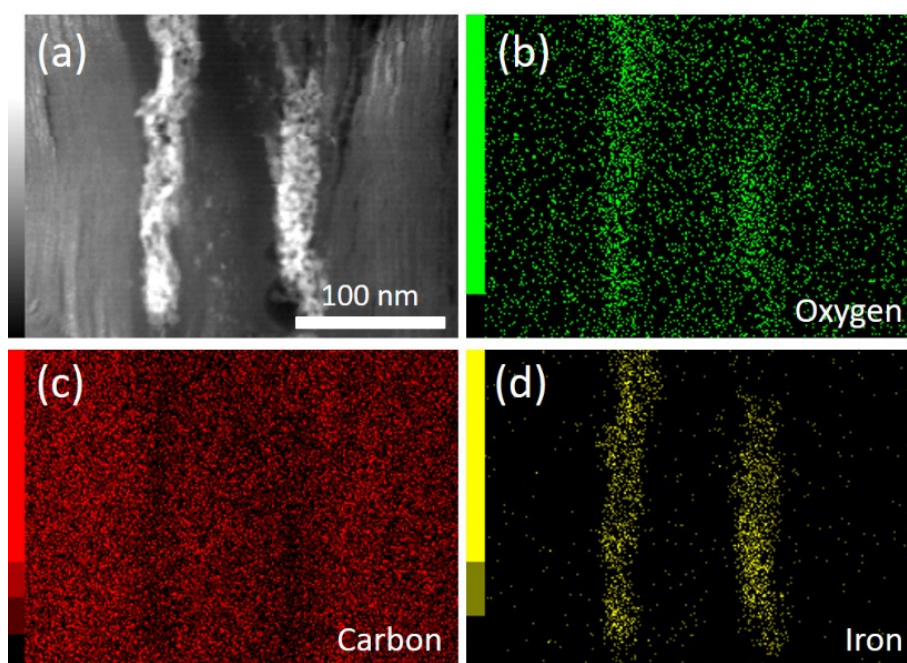

**Fig. S4** The cross-sectional (a) HAADF-STEM image and (b-d) TEM elemental mapping images of the GO/IO hybrid prepared from the thermal treatment of the GO/PB sample (GO:PB =25:75) at 400 °C in air.

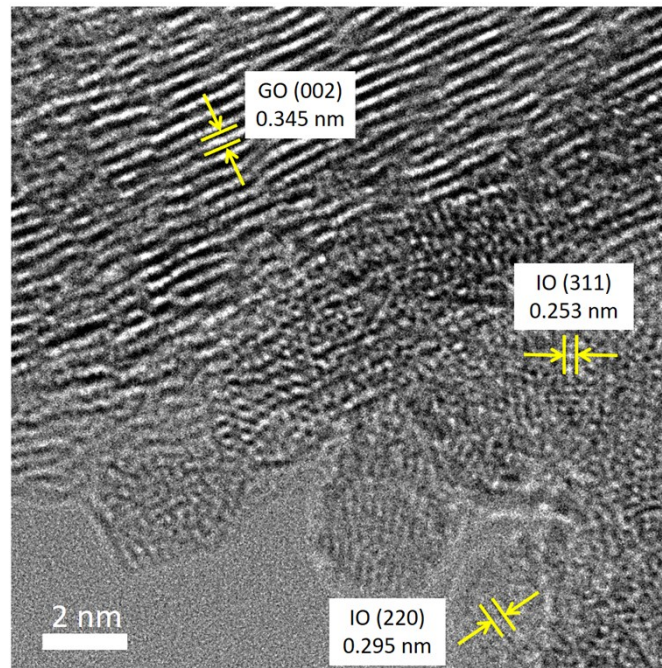

**Fig. S5** High-resolution TEM (HRTEM) image of the interface between GO and IO.

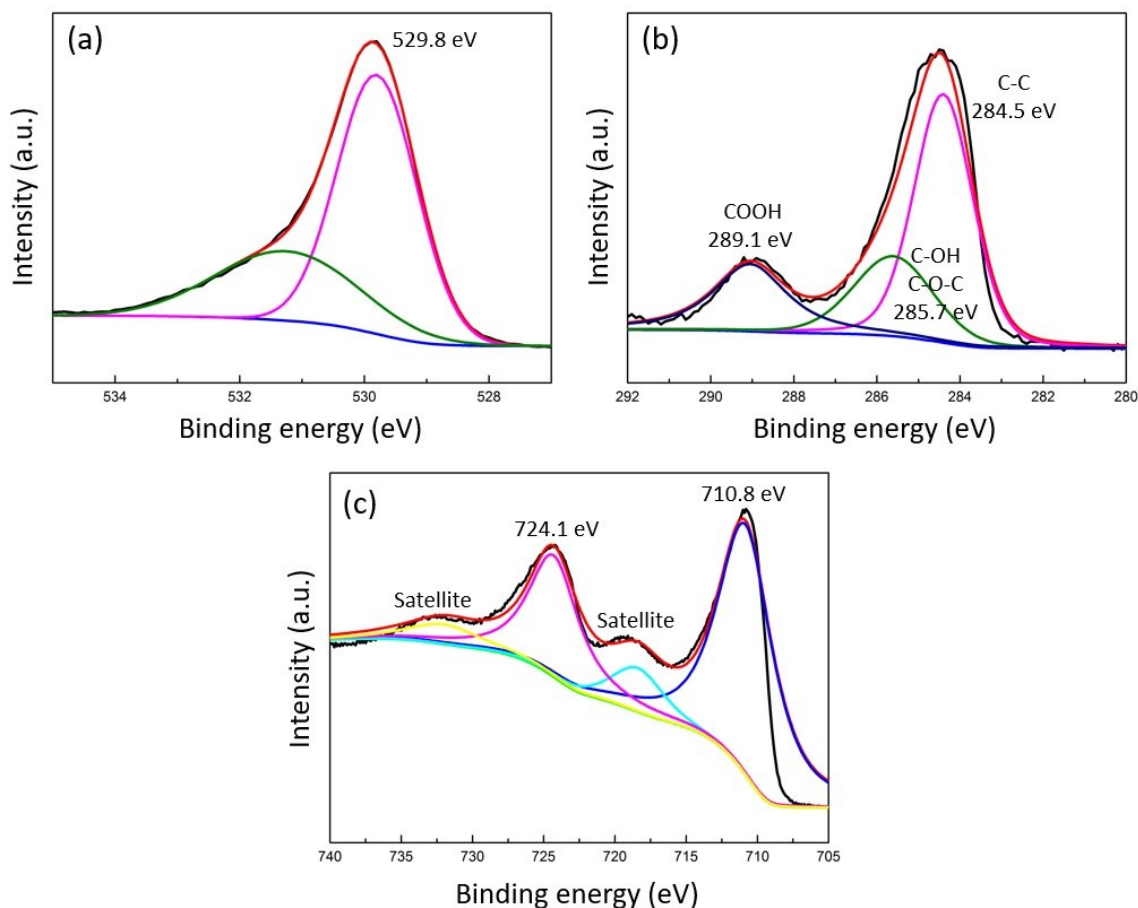

**Fig. S6** High-resolution XPS spectra for (a) O 1s, (b) C 1s (c) Fe 2p orbitals of the GO/IO hybrid prepared from the thermal treatment of the GO/PB sample (GO:PB =25:75) at 400 °C in air.

**Note:** The O1s XPS peak appears at a binding energy of 529.8 eV, which shows the typical metal oxide state (**Fig. S6a**).<sup>[R1]</sup> Another peak at a higher binding energy can be attributed to the surface OH group.<sup>[R2]</sup> The C1s XPS peaks are deconvoluted to 284.5 eV (C-C), 285.7 eV (C-OH, C-O-C), and 289.1 eV (COOH), respectively (**Fig. S6b**).<sup>[R2]</sup> The two Fe 2p XPS peaks at 710.8 and 724.1 eV with two satellite peaks are indicative of the Fe<sup>3+</sup> state, thus confirming the successful conversion of the initial PB to Fe<sub>2</sub>O<sub>3</sub> (**Fig. S6c**).<sup>[R1]</sup>

[R1] S. Tanaka, B. P. Bastakoti, Y. Li, S. Yusa, D. Ishii, K. Kani, A. Fatehmulla, W. A. Farooq, M. A. A. Shiddiky, Y. Bando, Y. V. Kaneti, Y. Yamauchi, and M. S. A. Hossain, *Eur. J. Inorg. Chem.*, 2017, **2017**, 1328-1332.

[R2] W. K. Jo and N. C. S. Selvam, *Dalton Trans.* 2015, **44**, 16024-16035.
